# 1 **Editing of the Human TRIM5 Gene to Introduce HIV-1 Restrictive** 2 **Mutations Using CRISPR-Cas9**

3 Caroline Dufour<sup>1</sup>, Alix Claudel<sup>1</sup>, Nicolas Joubarne<sup>1</sup>, Natacha Merindol<sup>1</sup>, Tara Maisonneet<sup>1</sup>,  
4 Mélodie B. Plourde<sup>1</sup>, Lionel Berthoux<sup>1,\*</sup>

5 <sup>1</sup>Laboratory of Antiviral Immunity, Department of Medical Biology, Université du Québec à Trois-  
6 Rivières, Trois-Rivières, Québec, Canada.

7 \*Corresponding author; E-Mail: [berthoux@uqtr.ca](mailto:berthoux@uqtr.ca)

8 Tel.: +1-819-376-5011 (ext. 4466); Fax: +1-819-376-5084.

9

## 10 **ABSTRACT**

11 The type I interferon (IFN-I)-inducible human restriction factor TRIM5 $\alpha$  inhibits the infection of  
12 human cells by specific nonhuman retroviruses, such as N-MLV and EIAV, but does not  
13 generally target HIV-1. However, the introduction of two aminoacid substitutions, R332G and  
14 R355G, in the human TRIM5 $\alpha$  (huTRIM5 $\alpha$ ) domain responsible for retroviral capsid recognition  
15 leads to efficient HIV-1 restriction. Using a simple DNA transfection-based CRISPR-Cas9  
16 genome editing protocol, we successfully mutated *TRIM5* to its HIV-1-restrictive version by  
17 homology-directed repair (HDR) in HEK293T cells. Nine clones bearing at least one HDR-  
18 edited *TRIM5* allele containing both mutations were isolated (5.6% overall efficiency), whereas  
19 another one contained only the R332G mutation. Of concern, several of these HDR-edited clones  
20 contained on-target undesired mutations, and none had all the alleles corrected. We observed a  
21 lack of HIV-1 restriction in the cell clones generated, even when cells were stimulated with IFN-

22 I prior to infection. This, however, was partly explained by the low potential for TRIM5 $\alpha$ -  
23 mediated restriction activity in this cell line as determined in control experiments. Our study  
24 demonstrates the feasibility of editing the TRIM5 gene to confer protection from HIV-1 in  
25 human cells and identifies the main challenges to be addressed in order to attain that goal.

26

## 27 **Introduction**

28 Viruses are obligate parasites whose success at infecting a host cell typically requires evasion  
29 from antiviral factors. In mammals, many cellular antiviral factors that can potentially interfere  
30 with the progression of viral infections have been identified. These factors can often act without  
31 external stimulation, but their expression and activity are enhanced by cytokines such as type I  
32 interferons (IFN-I) <sup>1</sup>. IFN-I cytokines are a multigene family of small peptides that include IFN-  
33  $\alpha$ , IFN- $\beta$ , IFN- $\epsilon$ , IFN- $\kappa$ , IFN- $\omega$ , IFN- $\delta$  and IFN- $\tau$  in humans <sup>2</sup>. Whereas these various IFN-I  
34 species all interact with the same receptor, they differ in IFN-stimulated gene (ISG)-, pathogen-  
35 and cell type-specificity <sup>3</sup>.

36 Among the ISGs relevant to retroviruses, the family of viruses to which HIV-1 belongs, is  
37 *TRIM5*, which encodes the cytoplasmic protein TRIM5 $\alpha$  <sup>4</sup>. In humans, *TRIM5* is transcribed into  
38 5 isoforms, among which only TRIM5 $\alpha$  possesses antiviral activity <sup>5</sup>. At its C-terminus, a  
39 domain called SPRY (PRYSPRY, B30.2) determines the retrovirus targeting specificity. This  
40 domain comprises hyper-variable loops that directly interact with the N-terminal domain of  
41 capsid proteins early after entry of the retrovirus into the host cell membrane <sup>6</sup>. When such  
42 interactions occurs, the retrovirus is inhibited (“restricted”) through mechanisms that include  
43 destabilization of the capsid core <sup>7</sup>, proteasomal degradation of some core components <sup>8</sup> and

44 sequestration of the viral particle in TRIM5 $\alpha$  cytoplasmic bodies<sup>9</sup>. huTRIM5 $\alpha$  generally has  
45 little-to-no activity against HIV-1, but efficiently inhibits the infectivity of the nonhuman  
46 gammaretrovirus “N-tropic” murine leukemia virus (N-MLV) as well as the nonhuman lentivirus  
47 equine infectious anemia virus (EIAV)<sup>10</sup>. Those two viruses are typically inhibited ~10-fold  
48 (EIAV) and ~100-fold (N-MLV) by endogenous huTRIM5 $\alpha$ , with some variation depending on  
49 the cellular context.

50 Several groups, including ours, have attempted to harness the antiviral power of TRIM5 $\alpha$  in  
51 order to interfere with HIV-1. This virus is efficiently restricted (~100-fold) by some orthologs  
52 of TRIM5 $\alpha$  found in Old World monkeys such as the Rhesus macaque TRIM5 $\alpha$  (rhTRIM5 $\alpha$ )<sup>4</sup>.  
53 However, significant sequence variation between the human and macaque orthologs preclude the  
54 possibility of using the latter one in gene therapy approaches, as this would increase the risk to  
55 elicit an immune response against the transgene in patients. Thus, all the studies have consisted  
56 in over-expressing versions of huTRIM5 $\alpha$  designed to target HIV-1 through modifications in the  
57 SPRY domain. Some of the TRIM5 $\alpha$  variants used were chimeric products containing small  
58 regions of rhTRIM5 $\alpha$  in the SPRY<sup>11,12</sup>. Other teams mapped with further precision the HIV-1  
59 restriction determinants in rhTRIM5 $\alpha$  that were absent in huTRIM5 $\alpha$ , leading to the discovery  
60 that mutating the Arg332 residue in huTRIM5 $\alpha$  was sufficient to inhibit HIV-1. Although initial  
61 observations<sup>13,14</sup> raised the hope that single mutations at this position might inhibit HIV-1 as  
62 efficiently as rhTRIM5 $\alpha$  did, later work made it clear that this was not the case<sup>15</sup>.

63 Our laboratory explored a different approach: generating libraries of TRIM5 $\alpha$  SPRY mutants  
64 then applying a functional screen to isolate mutants that conferred HIV-1 restriction<sup>16,17</sup>. These  
65 studies identified mutations at Arg335 inhibiting HIV-1 by 5- to 10-fold. When we combined a  
66 mutation at Arg335 (R335G) with one at Arg 332 (R332G), we obtained restriction levels that

67 were higher than with either of the single mutants<sup>16,17</sup>. Although not quite as restrictive as  
68 rhTRIM5 $\alpha$ , R332G-R335G huTRIM5 $\alpha$  efficiently inhibited the propagation of a highly  
69 pathogenic strain of HIV-1, and cells expressing the transgene had a survival advantage over  
70 unmodified cells<sup>15</sup>.

71 Although R332G-R335G huTRIM5 $\alpha$  is considered a prime candidate in HIV-1 gene therapy  
72 approaches to inhibit HIV-1, using lentiviral vectors to overexpress it in human cells is not  
73 without caveats. Indeed, the physiological effects of TRIM5 $\alpha$  overexpression *in vivo* are not  
74 clear, considering that it is involved in innate immune responses<sup>18,19</sup> and possibly in autophagy  
75<sup>20</sup>. In addition, the genotoxicity of lentiviral vectors integrating in the human genome is still  
76 poorly predictable. In the longer term, it would thus be desirable to be able to introduce  
77 mutations in the endogenous human *TRIM5* by genome editing. Here we describe the use of  
78 Clustered Regularly Interspaced Short Palindromic Repeats with Cas9 (CRISPR-Cas9) and of a  
79 single-stranded homology-directed repair (HDR) donor DNA to successfully mutate Arg332 and  
80 Arg335 in a human cell line.

## 81 **Results**

82 **Strategy for the mutagenesis of *TRIM5* by HDR.** Human *TRIM5* is found on chromosome  
83 11p15.4 and the region of the gene encoding the SPRY domain is present in exon 8 (Fig. 1A).  
84 We searched for DNA loci close to the codons for Arg332 and Arg335 that would be potential  
85 targets for CRISPR-Cas9-mediated double-strand cleavage. CRISPR guide RNAs (gRNAs) were  
86 designed for the 3 potential target sites that were nearest to the two codons to be mutated (Fig.  
87 1B). CRISPR plasmids expressing Cas9 along with one of the designed gRNAs were transfected  
88 in human embryonic kidney 293T cells (HEK293T), and a Surveyor assay was performed to test  
89 the capacity of the three gRNAs to target the endogenous *TRIM5* gene. Results showed that all

90 three gRNAs were competent (Fig. 1B). Because gRNA1 induces a cleavage that is closest to the  
91 targeted codons (right before the first nt of Arg332), the rest of the project was carried out with  
92 this gRNA. The HDR donor DNA consisted of a single-stranded oligodeoxynucleotide (ssODN)  
93 that was 200 nt long and antisense relative to the gRNA, in keeping with published methods<sup>21,22</sup>.  
94 The central section of this ssODN containing the mutations introduced is shown in Fig. 1C  
95 (depicted in the same orientation as the TRIM5 mRNA for clarity purposes). In addition to the  
96 mutations substituting arginine residues into glycine at positions 332 and 335, we included 4  
97 silent mutations in the region recognized by the gRNA and 1 more silent mutation in the  
98 protospacer adjacent motif (PAM), amounting to a total of 7 substitutions expected to prevent the  
99 cleavage of the donor DNA by Cas9. One of the mutations also created a HaeIII cut site for  
100 convenient downstream screening of the cell clones obtained.

101 **Isolation of *TRIM5*-edited HEK293T clones.** We transiently transfected a plasmid (pX459)  
102 expressing Cas9 and the gRNA1 into HEK293T cells, along with the ssODN. Single-cell clones  
103 were then isolated by limiting dilution. We screened 161 clones at random for the presence of  
104 HDR-modified alleles by specifically amplifying the mutated TRIM5 sequence using a primer  
105 whose sequence is indicated in Fig. 1c. As shown in Supplementary Fig. 1, 14 clones showed a  
106 positive signal (of varying intensity) in this assay. One of the clones, F2X, yielded a band whose  
107 size seemed bigger compared to another positive clone (C8) analyzed on the same gel. All these  
108 clones (minus A12, which did not survive) were re-analyzed using the same specific PCR assay  
109 and also using a second assay in which the targeted region is amplified and then digested by  
110 HaeIII, which cuts at a site created by one of the silent mutations (see Fig. 1c). In the latter assay,  
111 amplification was done using primers that bind outside the 200 nts corresponding to the donor  
112 ssODN in order to insure that the ssODN was not inadvertently detected. Figure 2 shows a

113 positive signal for 10 of these clones in both assays. The three remaining clones were negative in  
114 both assays.

115 **Genotype analysis.** The 10 clones showing indications of HDR-mediated editing were then  
116 subjected to PCR using the same primers that were also utilized in the HaeIII screen described  
117 above. PCR products were analyzed by deep sequencing, and a color-coded alignment of the  
118 results is shown in Fig. 3. The HEK293 cells and their derivatives are pseudotriploid<sup>23</sup> and  
119 accordingly, we found that two clones had two *TRIM5* alleles and seven were triploid. F2X  
120 seemed to possess 6 *TRIM5* alleles, a finding that is discussed below. For each clone, both  
121 desired mutations at Arg332 and Arg335 were present on one allele or more, with the exception  
122 of F2 which only had the Arg332 mutation. However, only one clone (D11) contained an allele  
123 with all 8 substitutions present. The HDR-generated alleles in the other cell clones generally  
124 contained the expected mutations in the PAM-proximal side of the cleavage site, with the  
125 exception of F2 which lacked the A-to-G mutation required to introduce the R335G change. All  
126 HDR-generated alleles had the A-to-C silent mutation creating the HaeIII restriction site at the  
127 first nucleotide upstream of the cleavage site on the PAM-distal side. This is consistent with the  
128 fact that all clones that were found to be positive in the specific PCR screen were also positive in  
129 the HaeIII assay (Fig. 2). Strikingly, for the three other substitution mutations in the PAM-distal  
130 region, only one clone (D11) had all of them whereas another one (F11) had only one. It would  
131 be tempting to conclude that HDR is biased so that mutations were more likely to be  
132 incorporated in the PAM-proximal side of the cut, and other teams have reported such  
133 imbalances in the conversion rate<sup>24</sup>. On the other hand, our specific PCR screen requires a  
134 successful amplification using a primer whose 3' half is complementary to the PAM-proximal

135 region (Fig. 1c), thus creating a bias toward the detection of mutated DNA containing the  
136 expected mutations in this PAM-proximal region.

137 Some HDR-generated alleles showed additional, unexpected mutations. In E5, one of the two  
138 HDR alleles had a one-nt deletion 16 nts from the cleavage site in the PAM-proximal  
139 region. In F11, the HDR allele had a 5 nt (TACCA) duplication in the same region. F2X showed  
140 an intriguing genotype: firstly, we found that the HDR allele was present in 17 % (1:6) of the  
141 amplicons, whereas 33 % (2:6) were wild-type (WT) and 50% (3:6) contained a TT insertion.  
142 HEK293 cells are known to be prone to chromosomal translocations leading to a high level of  
143 variation in copy numbers <sup>25</sup>, which might explain our findings. The HDR-generated allele in  
144 F2X had a surprising structure, with a 21 nt duplication consistent with the slower-migrating  
145 bands in Fig. 2 and in Supplementary Fig. 1. The repeated sequence that was closest to the  
146 cleavage site had the expected mutations in the PAM and at Arg335 and also contained an  
147 additional substitution (G-to-A) that is not present in the donor ssODN, whereas the second  
148 repeat of this sequence only had the G-to-C mutation in the PAM. These HDR-generated alleles  
149 that also contained unexpected insertions/deletions (indels) are unlikely to encode functional  
150 TRIM5 $\alpha$ , due to the frameshifts leading to premature termination (E5, F11) or due to the  
151 insertion of 7 aminoacids at a region crucial for capsid binding (F2X). The rest of the HDR-  
152 generated alleles (in C1, C8, C10, D5, D12 and one of the two HDR alleles in E5), however, may  
153 potentially encode proteins that efficiently target HIV-1.

154 Examination of the *TRIM5* alleles not modified by HDR in these cell clones revealed that they  
155 showed clear signs of NHEJ-induced mutations, i.e. indels at the cleavage site. 8 alleles had an A  
156 inserted at the cleavage site, whereas one of the F2X alleles had a TT inserted at the same locus.  
157 The A insertion was so prevalent that in half of the clones (C1, C10, D11, F2, F11), 2 of the 3

158 *TRIM5* copies were mutated by NHEJ leading to this particular mutation. Although the nature of  
159 NHEJ-directed mutations is known to vary widely depending on the gRNA used <sup>26</sup>, such +1  
160 insertions have been described to be prevalent as a result of Cas9 editing <sup>27,28</sup>. One D5 allele had  
161 a larger, 27 nt-long deletion whereas one D12 allele had a single deletion at the cleavage site.  
162 Therefore, and with the exception of F2X, our data strongly suggest that in all cell clones in  
163 which one or two of the *TRIM5* alleles were mutated by HDR, the remaining alleles were  
164 mutated by NHEJ. This is consistent with findings published by others <sup>21</sup>. Furthermore, these  
165 NHEJ-generated *TRIM5* alleles are all expected to encode non-functional TRIM5 $\alpha$  due to  
166 missense mutations in the SPRY domain and premature termination.

167 **Lack of HIV-1 restriction activity in the *TRIM5*-edited cells.** We challenged the 10 cell  
168 clones with HIV-1<sub>NL-GFP</sub>, an HIV-1-derived vector that was previously used extensively to study  
169 TRIM5 $\alpha$  <sup>29</sup>. Cells were infected with several different amounts of the GFP-encoding vector, and  
170 the % of GFP-positive cells was calculated by FACS as a measurement of infectivity (Fig. 4a).  
171 Compared with the parental HEK293T cells, some of the clones showed a slightly increased  
172 permissiveness (up to 3-fold) whereas others were slightly less permissive to the infection (up to  
173 2-fold). Because of the expected cell-to-cell variation in susceptibility to retroviral infection,  
174 irrespective of TRIM5 $\alpha$ , we challenged the same cell populations with other retroviral vectors,  
175 derived from the nonhuman primate lentivirus SIVmac239, the equine lentivirus EIAV, as well  
176 as the huTRIM5 $\alpha$ -sensitive murine oncoretrovirus N-MLV and its huTRIM5 $\alpha$ -insensitive  
177 counterpart B-MLV. In previous studies, we found that compared to the WT huTRIM5 $\alpha$ , the  
178 R332G-R335G mutant restricted SIVmac and N-MLV at slightly higher levels, whereas EIAV  
179 and B-MLV were not affected <sup>16</sup>. Therefore, if HIV-1 was specifically restricted by a TRIM5 $\alpha$   
180 mutant in a given cell clone, we would expect the EIAV and B-MLV vectors to be restriction-



181 negative controls. However, the infectivity profiles obtained in the various cell populations were  
182 similar. In particular, C10 was the cell clone least permissive to HIV-1<sub>NL-GFP</sub> (Fig. 4a), but it was  
183 also poorly permissive toward infection by the 4 other retroviral vectors (Fig. 4b-e). Likewise,  
184 C1 was relatively more susceptible to infection by HIV-1<sub>NL-GFP</sub>, but these cells were also more  
185 permissive to infection with the other 4 retroviral vectors. Of interest, however, was the fact that  
186 N-MLV<sub>GFP</sub> was less infectious in the parental cells compared with most of the cell clones,  
187 hinting at slightly higher relative levels of restriction in the parental cells for this virus. In  
188 conclusion, the modest variations in HIV-1 infectivity observed between cell clones result from  
189 cellular factors other than TRIM5 $\alpha$ , and instead are probably due to variations in the expression  
190 levels of “positive” factors such as the receptor for the viral vector envelope used here.

191 **Interferon treatment does not induce HIV-1 restriction in *TRIM5*-edited cells.** In the  
192 infection experiment described above, we were surprised to find that the N-MLV vector was  
193 more infectious than is usually observed in human cells. Indeed, N-MLV is usually restricted  
194 ~100-fold in human cells such as HeLa cells<sup>30</sup>, whereas the restriction level was closer to 3-fold  
195 in our HEK293T cells. It is possible that TRIM5 $\alpha$  expression levels are lower in this particular  
196 cell line. TRIM5 $\alpha$  transcription is stimulated by IFN-I, especially IFN- $\beta$ <sup>31</sup>. Therefore, we  
197 reasoned that IFN-I treatment might reveal a restriction activity against HIV-1 and N-MLV by  
198 boosting TRIM5 $\alpha$  levels. To test this possibility, we challenged the parental HEK293T cells as  
199 well as each of the 10 clones with the HIV-1, SIVmac, N-MLV and B-MLV vectors and in the  
200 absence or presence of IFN- $\alpha$ , IFN- $\beta$  and IFN- $\omega$  (Fig. 5). In the parental cells, we observed that  
201 treatment with IFN- $\alpha$  and IFN- $\beta$ , but not IFN- $\omega$ , slightly inhibited the infectivity of the HIV-1  
202 vector (Fig. 5a) but had a relatively bigger effect (2-fold) on the N-MLV vector (Fig. 5c). IFN- $\beta$   
203 had a very small inhibitory effect on B-MLV, whereas the two other IFN-I species did not affect

204 the infectivity of this virus (Fig. 5d). These results are consistent with IFN- $\alpha$  and IFN- $\beta$  (but not  
205 IFN- $\omega$ ) enhancing TRIM5 $\alpha$  expression, hence leading to a specific increase in N-MLV  
206 restriction. In the absence of IFN-I, the permissiveness of the cell populations to HIV-1<sub>NL-GFP</sub>  
207 infection varied within a ~4-fold window (Fig. 5a), similar to what we observed in the  
208 experiment shown in Fig. 4. IFN-I had little-to-no effect on the infectivity of HIV-1<sub>NL-GFP</sub> in the  
209 10 cell clones analyzed, implying that the treatment did not induce restriction. Interestingly, N-  
210 MLV<sub>GFP</sub> infectivity was similarly not decreased by IFN-I treatment in the 10 edited cell clones  
211 except for D5, and in the presence of IFN- $\alpha$  or IFN- $\beta$ , N-MLV<sub>GFP</sub> was more infectious in all of  
212 the clones than it was in the treated parental cells. These observations suggest that N-MLV  
213 restriction was lost in the cell clones due to the mutations introduced in *TRIM5*.

214 **HEK293T cells are suboptimal for TRIM5 $\alpha$ -mediated restriction.** Since we had  
215 unexpectedly observed that N-MLV was not efficiently restricted by the WT endogenous *TRIM5*  
216 in the HEK293T cells used here, we scrutinized its sequence more closely. A published study  
217 showed that *TRIM5* in this cell line carries a SNP resulting in the R136Q mutation<sup>25</sup>. The effects  
218 of this mutation on retroviral restriction are unclear, with some authors linking it to an increase  
219 in susceptibility toward HIV-1 whereas others find the opposite<sup>32</sup>. The presence of this SNP  
220 might explain the weak restriction levels observed in this study. In addition, HEK293T cells  
221 might provide an inadequate environment for TRIM5 $\alpha$  to restrict retroviruses, irrespective of the  
222 R136Q mutation in *TRIM5*. To test this possibility, we stably transduced R332G-R335G  
223 huTRIM5 $\alpha$  into 293s. In other cell lines tested, transduction of this double mutant leads to a ~20-  
224 fold decrease in HIV-1 infectivity<sup>16,17,29</sup>. In HEK293T cells, however, we observed restriction  
225 levels that were closer to 3-fold (Supplementary Fig. 2). We conclude that the potential for  
226 TRIM5 $\alpha$ -mediated restriction is abnormally low in HEK293T cells.

## 227 **Discussion**

228 Genome editing has the potential to considerably expand the range of genetic interventions  
229 available to treat disease. Although the majority of the applications pursued at present concern  
230 monogenic inheritable diseases<sup>33</sup> and cancer<sup>34</sup>, chronic infectious diseases may also be  
231 addressed by genome editing, especially in cases where pharmacological treatments are  
232 nonexistent or noncurative<sup>35</sup>. Regarding HIV-1, many genome editing-based approaches have  
233 aimed at knocking out its co-receptor CCR5 using zinc finger nucleases (ZFNs), transcription  
234 activator-like effector nucleases (TALENs) or CRISPR-Cas systems<sup>28,36,37</sup>. Although CCR5-  
235 targeting is at a more advanced state of development compared with other approaches, it is not  
236 without caveats. For instance, the frequent presence of CXCR4 tropism may decrease the  
237 usefulness of CCR5 knockout in some patients<sup>38</sup>. In addition, reports have linked the loss of  
238 CCR5 function with an increased sensitivity to several serious pathologies<sup>39</sup>, suggesting that  
239 CCR5 depletion might not be as innocuous as initially thought. Thus, there is impetus to pursue  
240 alternative strategies for a genetic intervention targeting HIV-1. The objective of the research  
241 program of which this study constitutes the first step is to introduce coding substitutions in  
242 *TRIM5* in order to modify its target specificity and enable HIV-1 restriction. Compared with  
243 CCR5 knockout, our approach presents advantages and some technical challenges. Among the  
244 benefits are the fact that no cellular gene is depleted; in fact, it is expected that R332G-R335G  
245 *TRIM5α* would retain all of its functions, including the restriction of some nonhuman  
246 retroviruses<sup>16</sup>. Furthermore, *TRIM5α*-mediated restriction might provide the added benefit of  
247 inducing a cellular antiviral state through the activation of NF-κB and AP-1<sup>40</sup>. Also, this  
248 approach does not include the expression of a foreign protein, and the changes introduced in  
249 *TRIM5* are minimal; therefore, immunogenicity should not be an issue.

250 To our knowledge, this is the first attempt at using genome editing to mutate a restriction factor  
251 and confer an innate antiviral function in human cells. Although we did not detect any antiviral  
252 activity following successful *TRIM5* editing events, we identified the likely reasons for this, of  
253 which the major one was the cellular model used here (HEK293T cells). Another factor likely  
254 impeding HIV-1 restriction was the co-presence of indel-containing *TRIM5* alleles in all cell  
255 clones in which an allele had been modified by HDR. It is predicted that the SPRY-truncated  
256 TRIM5 $\alpha$  proteins resulting from the presence of indels will interact with the full-length TRIM5 $\alpha$   
257 and will interfere with its targeting of incoming retroviruses, similar to the activity of natural,  
258 shorter TRIM5 isoforms<sup>5,41</sup>. Therefore, in addition to increasing the overall percentage of edited  
259 cells, future research will need to address the difficulty of achieving bi-allelic HDR-mediated  
260 editing. Recent technological advances, including the development of a marker-free system to  
261 enrich cells in which HDR occurred<sup>42</sup>, are likely to enhance editing efficiency as well as bi-  
262 allelic editing. Also affecting the therapeutic potential of *TRIM5* editing in our study was the  
263 occurrence of unwanted on-target indels in 3 out of 9 alleles bearing the two therapeutic  
264 mutations. Therefore, future studies will also need to identify the determinants of fidelity in HDR  
265 repair in order to minimize the incidence of such indels. Despite the absence of an antiviral  
266 effect, it is encouraging that we could relatively easily obtain cells in which one or two alleles of  
267 *TRIM5* had the desired therapeutic mutations using a simple DNA transfection-based protocol.  
268 This study paves the way and identifies the pitfalls toward the goal of efficient, bi-allelic,  
269 scarless *TRIM5* editing in order to confer HIV-1 resistance in human cells.

## 270 **Methods**

271 **Cells and *TRIM5* genotyping.** HEK293T cells were maintained in Dulbecco's modified Eagle's  
272 medium (DMEM; HyClone). All culture media were supplemented with 10% fetal bovine serum

273 (FBS) and penicillin/streptomycin (HyClone). To analyze the sequence of the targeted genomic  
274 region, cellular DNA was prepared using the Bioline genomic DNA kit (London, UK), and the  
275 *TRIM5* region encompassing the targeted locus was PCR-amplified using primers  
276 T5a\_Surveyor\_fwd (5'GTCCGACGCTACTGGGGTAAG) and T5a\_Surveyor\_rev  
277 (5'ATAATCACAGAGAGGGGCACA). The PCR product was Sanger-sequenced using the  
278 same primers. We found no variation in this region compared to the consensus sequence (NCBI  
279 Gene ID: 85363).

280 **Design of gRNAs and Surveyor assay.** The lentiviral expression vector pLentiCRISPRv2  
281 (pLCv2) was a gift from Feng Zhang (Addgene plasmid # 52961)<sup>43</sup>. Three gRNAs targeting  
282 *TRIM5* were designed using the Zhang lab online software available at [crispr.mit.edu](http://crispr.mit.edu). The  
283 sequences targeted are 5'AGATAATATATGGGGCACGA (gRNA1),  
284 5'CCGAAACCACAGATAATATA (gRNA9) and 5'AATTGAAATTCACAAATGTC  
285 (gRNA19). The ODNs needed for the generation of pLCv2-based constructs targeting those  
286 sequences were designed exactly as described in published protocols<sup>26,43</sup>. Sense/antisense pairs  
287 of primers were annealed and cloned into pLCv2 cut with BsmBI. To evaluate the capacity of the  
288 constructed plasmids to induce on-target indels in *TRIM5*, a surveyor nuclease assay was  
289 performed. HEK293T cells were transfected with either pLCv2-gRNA1, -gRNA9 or -gRNA19  
290 using polyethyleneimine<sup>44</sup>. 3 d later, the genomic DNA was extracted from the transfected cells  
291 using the Bioline genomic DNA kit. The targeted *TRIM5* region was PCR-amplified using  
292 primers T5a\_Surveyor\_fwd and T5a\_Surveyor\_rev. PCR amplicons were heat-denatured at 95  
293 °C, and re-annealed by slow cooling to promote formation of dsDNA heteroduplexes. The  
294 heteroduplexes were then cleaved by Surveyor nuclease S provided as part of the Transgenomic

295 Surveyor mutation detection kit (Integrated DNA Technologies, Coralville, IA), according to the  
296 manufacturer's instructions. Digestion products were visualized by agarose gel electrophoresis.

297 **Design of the HDR donor DNA and *TRIM5* editing.** The following *TRIM5* minus strand-  
298 derived HDR DNA was synthesized by Integrated DNA Technologies:

299 5'CGTCTACCTCCCAGTAATGTTTCCCTGATGTGATACTTTGAGAGCCCAGGATGCCA  
300 GTACAATAATTGAAATTCACAAATGTCTGGTATCCTGTGCCGCCGCCGCCCGTAGATT  
301 ATTTGTGGTTTCGGAGAGCTCACTTGTCTCTTATCTTCAGAAATGACAGCACATGAA  
302 ATGTTGTTTGGAGCCACTGTACATCAACT. Residues mutated compared to the WT  
303 *TRIM5* sequence are underlined. pX459-gRNA1 was constructed in a manner similar to pLCv2-  
304 gRNA1, by ligating the corresponding annealed gRNA1 ODN duplex into pX459  
305 (pSpCas9(BB)-2A-Puro; Addgene #62988)<sup>45</sup> digested with BbsI. HEK293T cells were plated in  
306 6-well plates at  $2.7 \times 10^5$  per well and transfected the next day using polyethyleneimine, with 2.5  
307  $\mu$ g of pX459-gRNA1 together with 5  $\mu$ l of the HDR DNA prepared at 20  $\mu$ M. When cells  
308 reached confluence, they were trypsinized and plated at 0.5 cell per well in 96-well plates, using  
309 conditioned medium. To screen the colonies for HDR-mediated *TRIM5* editing, part of the cells  
310 were lysed in the DirectPCR Lysis reagent (Viagen Biotech, Los Angeles, USA) diluted 1:1 in  
311 proteinase K-containing water as recommended by the manufacturer. Lysis was allowed to  
312 proceed overnight at 55°C followed by heating at 85°C for 90 min to deactivate proteinase K.  
313 For the specific PCR-based screening, 5  $\mu$ l of the lysed cells were subjected to PCR using  
314 primers T5a\_mut\_fwd (5'-AAATAATCTACGGGGCCGGCGGCACAG) and T5a\_qPCR\_rev  
315 (5'-CCAGCACATACCCCCAGGAT). PCR was performed for 30 cycles using the following  
316 conditions: 30 sec at 94°C, 30 sec at 61.5°C, 30 sec at 68°C. The 157-bp expected PCR product  
317 was resolved on agarose gels. For the HaeIII-based screening, lysed cells were subjected to PCR

318 using primers T5a\_Surveyor\_fwd and T5a\_Surveyor\_rev, similar to the Surveyor assay. 10  $\mu$ l of  
319 the PCR product were digested by HaeIII for 60 min at 37°C. The reaction products were  
320 analyzed using agarose gels in order to reveal the 307-bp and 372-bp bands corresponding to  
321 digested products. For MiSeq sequencing, cellular DNA was submitted to PCR using the  
322 following ODNs, which bind to DNA sequences located 10 nt outside the 200 nt-long region  
323 corresponding to the HDR: huTR5aGG\_seq\_FOR,  
324 5' ACACTGACGACATGGTTCTACAATCCCTTAGCTGACCTGTTA, and  
325 huTR5aGG\_seq\_REV,  
326 5' TACGGTAGCAGAGACTTGGTCTCCCCAGGATCCAAGCAGTT. The underlined  
327 sequences are barcodes. MiSeq sequencing results were analyzed using the online tool  
328 Integrative Genomics Viewer (<http://software.broadinstitute.org/software/igv/>).

329 **Retroviral vectors production and viral challenges.** To generate the HEK293T cells stably  
330 expressing WT and R332G-R335G huTRIM5 $\alpha$ , cells were transduced with the corresponding  
331 pMIP-huTRIM5 $\alpha$  vectors followed by puromycin selection as described previously<sup>16</sup>. To  
332 produce GFP-expressing retroviral vectors, HEK293T cells were seeded in 10 cm culture dishes  
333 and transiently co-transfected with the following plasmids: pMD-G, pCNCG and pCIG3-B or  
334 pCIG3-N to produce B-MLV<sub>GFP</sub> and N-MLV<sub>GFP</sub>, respectively; pMD-G and pHIV-1<sub>NL-GFP</sub> to  
335 produce HIV-1<sub>NL-GFP</sub>; pMD-G and pSIV<sub>mac239-GFP</sub> to produce SIV<sub>mac-GFP</sub>; or pONY3.1, pONY8.0  
336 and pMD-G to produce EIAV<sub>GFP</sub> (see<sup>46,47</sup> and references therein). For retroviral challenges, cells  
337 were seeded into 96-well plates at 10,000 cells per well and infected the following day with  
338 multiple doses of the GFP-expressing retroviral vectors. Cells were trypsinized at 2 d post-  
339 infection and fixed in 2.5% formaldehyde (Fisher Scientific, MA, USA). The percentage of GFP-  
340 positive cells was then determined by analyzing  $1 \times 10^4$  cells on a FC500 MPL cytometer

341 (Beckman Coulter, CA, USA) using the CXP Software (Beckman Coulter). For infections done  
342 in presence of IFN-I, recombinant human IFN- $\alpha$ , IFN- $\beta$  or IFN- $\omega$  (PeproTech, Rocky Hill, NJ)  
343 was added to cell cultures 16 h prior to infection and at a final concentration of 10 ng/ml.

344

### 345 **Acknowledgements**

346 We are grateful to Feng Zhang (Broad Institute, Cambridge, USA) for sharing reagents. We  
347 thank Pierre Lepage and Frédérick Robidoux (Genome Quebec Innovation Center, Montréal) for  
348 help with MiSeq data generation and analysis. This research received support from the Réseau  
349 SIDA et Maladies Infectieuses du Fonds de Recherche du Québec - Santé, from the Canadian  
350 Institutes of Health Research and from the National Sciences and Engineering Council of  
351 Canada.

352

### 353 **Author contributions**

354 CD and LB designed the study, interpreted results, prepared figures and wrote the main  
355 manuscript. CD, AC, NJ, TM and MBP performed experiments. AC, NM and MBP helped  
356 design specific portions of the study. All authors reviewed the manuscript.

357

### 358 **Competing financial interests**

359 The authors declare no competing financial interests.

360



361 **Availability of materials and data**

362 The datasets generated during the current study are available in the FigShare repository,

363 [https://figshare.com/projects/Dufour\\_et\\_al\\_2017/24445](https://figshare.com/projects/Dufour_et_al_2017/24445). Biological materials are available for

364 sharing.

365

## 366 References

- 367 1 Schoggins, J. W. & Rice, C. M. Interferon-stimulated genes and their antiviral effector functions.  
368 *Curr Opin Virol* **1**, 519-525, doi:10.1016/j.coviro.2011.10.008 (2011).
- 369 2 Pestka, S., Krause, C. D. & Walter, M. R. Interferons, interferon-like cytokines, and their  
370 receptors. *Immunological reviews* **202**, 8-32, doi:10.1111/j.0105-2896.2004.00204.x (2004).
- 371 3 Schanen, C., Chieux, V., Lobert, P. E., Harvey, J. & Hober, D. Correlation between the anti-virus-  
372 induced cytopathic effect activity of interferon-alpha subtypes and induction of MxA protein in  
373 vitro. *Microbiology and immunology* **50**, 19-24 (2006).
- 374 4 Stremlau, M. *et al.* The cytoplasmic body component TRIM5alpha restricts HIV-1 infection in Old  
375 World monkeys. *Nature* **427**, 848-853 (2004).
- 376 5 Battivelli, E. *et al.* Modulation of TRIM5alpha activity in human cells by alternatively spliced  
377 TRIM5 isoforms. *Journal of virology* **85**, 7828-7835, doi:10.1128/JVI.00648-11 (2011).
- 378 6 Malim, M. H. & Bieniasz, P. D. HIV Restriction Factors and Mechanisms of Evasion. *Cold Spring*  
379 *Harbor perspectives in medicine* **2**, a006940, doi:10.1101/cshperspect.a006940 (2012).
- 380 7 Takeda, E. *et al.* Fluorescent image analysis of HIV-1 and HIV-2 uncoating kinetics in the  
381 presence of old world monkey TRIM5alpha. *PLoS One* **10**, e0121199,  
382 doi:10.1371/journal.pone.0121199 (2015).
- 383 8 Kutluay, S. B., Perez-Caballero, D. & Bieniasz, P. D. Fates of Retroviral Core Components during  
384 Unrestricted and TRIM5-Restricted Infection. *PLoS Pathog* **9**, e1003214,  
385 doi:10.1371/journal.ppat.1003214 (2013).
- 386 9 Campbell, E. M., Perez, O., Anderson, J. L. & Hope, T. J. Visualization of a proteasome-  
387 independent intermediate during restriction of HIV-1 by rhesus TRIM5alpha. *The Journal of cell*  
388 *biology* **180**, 549-561 (2008).
- 389 10 Keckesova, Z., Ylinen, L. M. & Towers, G. J. The human and African green monkey TRIM5alpha  
390 genes encode Ref1 and Lv1 retroviral restriction factor activities. *Proceedings of the National*  
391 *Academy of Sciences of the United States of America* **101**, 10780-10785,  
392 doi:10.1073/pnas.0402474101 (2004).
- 393 11 Walker, J. E. *et al.* Generation of an HIV-1-resistant immune system with CD34(+) hematopoietic  
394 stem cells transduced with a triple-combination anti-HIV lentiviral vector. *Journal of virology* **86**,  
395 5719-5729, doi:10.1128/JVI.06300-11 (2012).
- 396 12 Sawyer, S. L., Wu, L. I., Emerman, M. & Malik, H. S. Positive selection of primate TRIM5alpha  
397 identifies a critical species-specific retroviral restriction domain. *Proceedings of the National*  
398 *Academy of Sciences of the United States of America* **102**, 2832-2837 (2005).
- 399 13 Li, Y., Li, X., Stremlau, M., Lee, M. & Sodroski, J. Removal of arginine 332 allows human  
400 TRIM5alpha to bind human immunodeficiency virus capsids and to restrict infection. *Journal of*  
401 *virology* **80**, 6738-6744 (2006).
- 402 14 Yap, M. W., Nisole, S. & Stoye, J. P. A single amino acid change in the SPRY domain of human  
403 Trim5alpha leads to HIV-1 restriction. *Current biology : CB* **15**, 73-78 (2005).
- 404 15 Jung, U. *et al.* Preclinical Assessment of Mutant Human TRIM5alpha as an Anti-HIV-1 Transgene.  
405 *Human gene therapy* **26**, 664-679, doi:10.1089/hum.2015.059 (2015).
- 406 16 Pham, Q. T., Bouchard, A., Grutter, M. G. & Berthoux, L. Generation of human TRIM5alpha  
407 mutants with high HIV-1 restriction activity. *Gene therapy* **17**, 859-871, doi:gt201040 [pii]  
408 10.1038/gt.2010.40 (2010).
- 409 17 Pham, Q. T. *et al.* A novel aminoacid determinant of HIV-1 restriction in the TRIM5alpha variable  
410 1 region isolated in a random mutagenic screen. *Virus research*,  
411 doi:10.1016/j.virusres.2013.01.013 (2013).

- 412 18 Pertel, T. *et al.* TRIM5 is an innate immune sensor for the retrovirus capsid lattice. *Nature* **472**,  
413 361-365, doi:10.1038/nature09976 (2011).
- 414 19 Nepveu-Traversy, M. E. & Berthoux, L. The conserved sumoylation consensus site in TRIM5alpha  
415 modulates its immune activation functions. *Virus research* **184C**, 30-38, doi:S0168-  
416 1702(14)00066-5 [pii]  
10.1016/j.virusres.2014.02.013 (2014).
- 417 20 Ribeiro, C. M. *et al.* Receptor usage dictates HIV-1 restriction by human TRIM5alpha in dendritic  
418 cell subsets. *Nature* **540**, 448-452, doi:10.1038/nature20567 (2016).
- 419 21 Paquet, D. *et al.* Efficient introduction of specific homozygous and heterozygous mutations using  
420 CRISPR/Cas9. *Nature* **533**, 125-129, doi:10.1038/nature17664 (2016).
- 421 22 Lin, S., Staahl, B. T., Alla, R. K. & Doudna, J. A. Enhanced homology-directed human genome  
422 engineering by controlled timing of CRISPR/Cas9 delivery. *eLife* **3**, e04766,  
423 doi:10.7554/eLife.04766 (2014).
- 424 23 Bylund, L., Kytola, S., Lui, W. O., Larsson, C. & Weber, G. Analysis of the cytogenetic stability of  
425 the human embryonal kidney cell line 293 by cytogenetic and STR profiling approaches.  
426 *Cytogenetic and genome research* **106**, 28-32, doi:10.1159/000078556 (2004).
- 427 24 Kan, Y., Ruis, B., Takasugi, T. & Hendrickson, E. A. Mechanisms of precise genome editing using  
428 oligonucleotide donors. *Genome research* **27**, 1099-1111, doi:10.1101/gr.214775.116 (2017).
- 429 25 Lin, Y. C. *et al.* Genome dynamics of the human embryonic kidney 293 lineage in response to cell  
430 biology manipulations. *Nature communications* **5**, 4767, doi:10.1038/ncomms5767 (2014).
- 431 26 Shalem, O. *et al.* Genome-scale CRISPR-Cas9 knockout screening in human cells. *Science* **343**, 84-  
432 87, doi:10.1126/science.1247005 (2014).
- 433 27 Mali, P. *et al.* RNA-guided human genome engineering via Cas9. *Science* **339**, 823-826,  
434 doi:10.1126/science.1232033 (2013).
- 435 28 Yang, L. *et al.* Optimization of scarless human stem cell genome editing. *Nucleic Acids Res* **41**,  
436 9049-9061, doi:10.1093/nar/gkt555 (2013).
- 437 29 Veillette, M. *et al.* The V86M mutation in HIV-1 capsid confers resistance to TRIM5alpha by  
438 abrogation of cyclophilin A-dependent restriction and enhancement of viral nuclear import.  
439 *Retrovirology* **10**, 25, doi:10.1186/1742-4690-10-25 (2013).
- 440 30 Pawlica, P. *et al.* Functional evidence for the involvement of microtubules and dynein motor  
441 complexes in TRIM5alpha-mediated restriction of retroviruses. *Journal of virology* **88**, 5661-  
442 5676, doi:10.1128/JVI.03717-13 (2014).
- 443 31 Carthagen, L. *et al.* Implication of TRIM alpha and TRIMCyp in interferon-induced anti-retroviral  
444 restriction activities. *Retrovirology* **5**, 59 (2008).
- 445 32 Merindol, N. & Berthoux, L. Restriction Factors in HIV-1 Disease Progression. *Current HIV*  
446 *research* **13**, 448-461 (2015).
- 447 33 Long, C., Amoasii, L., Bassel-Duby, R. & Olson, E. N. Genome Editing of Monogenic  
448 Neuromuscular Diseases: A Systematic Review. *JAMA neurology* **73**, 1349-1355,  
449 doi:10.1001/jamaneurol.2016.3388 (2016).
- 450 34 Yi, L. & Li, J. CRISPR-Cas9 therapeutics in cancer: promising strategies and present challenges.  
451 *Biochim Biophys Acta* **1866**, 197-207, doi:10.1016/j.bbcan.2016.09.002 (2016).
- 452 35 Cornu, T. I., Mussolino, C. & Cathomen, T. Refining strategies to translate genome editing to the  
453 clinic. *Nat Med* **23**, 415-423, doi:10.1038/nm.4313 (2017).
- 454 36 Tebas, P. *et al.* Gene editing of CCR5 in autologous CD4 T cells of persons infected with HIV. *The*  
455 *New England journal of medicine* **370**, 901-910, doi:10.1056/NEJMoa1300662 (2014).
- 456 37 Ye, L. *et al.* Seamless modification of wild-type induced pluripotent stem cells to the natural  
457 CCR5Delta32 mutation confers resistance to HIV infection. *Proceedings of the National Academy*  
458

- 459 *of Sciences of the United States of America* **111**, 9591-9596, doi:10.1073/pnas.1407473111  
460 (2014).
- 461 38 Esbjornsson, J. *et al.* Frequent CXCR4 tropism of HIV-1 subtype A and CRF02\_AG during late-  
462 stage disease--indication of an evolving epidemic in West Africa. *Retrovirology* **7**, 23,  
463 doi:10.1186/1742-4690-7-23 (2010).
- 464 39 Telenti, A. Safety concerns about CCR5 as an antiviral target. *Current opinion in HIV and AIDS* **4**,  
465 131-135, doi:10.1097/COH.0b013e3283223d76 (2009).
- 466 40 Lascano, J., Uchil, P. D., Mothes, W. & Luban, J. TRIM5 Retroviral Restriction Activity Correlates  
467 with the Ability To Induce Innate Immune Signaling. *Journal of virology* **90**, 308-316,  
468 doi:10.1128/JVI.02496-15 (2015).
- 469 41 Berthoux, L., Sebastian, S., Sayah, D. M. & Luban, J. Disruption of human TRIM5alpha antiviral  
470 activity by nonhuman primate orthologues. *Journal of virology* **79**, 7883-7888 (2005).
- 471 42 Agudelo, D. *et al.* Marker-free coselection for CRISPR-driven genome editing in human cells.  
472 *Nature methods* **14**, 615-620, doi:10.1038/nmeth.4265 (2017).
- 473 43 Sanjana, N. E., Shalem, O. & Zhang, F. Improved vectors and genome-wide libraries for CRISPR  
474 screening. *Nature methods* **11**, 783-784, doi:10.1038/nmeth.3047 (2014).
- 475 44 Masroori, N. *et al.* Gene Knockout Shows That PML (TRIM19) Does Not Restrict the Early Stages  
476 of HIV-1 Infection in Human Cell Lines. *mSphere* **2**, doi:10.1128/mSphereDirect.00233-17 (2017).
- 477 45 Ran, F. A. *et al.* Genome engineering using the CRISPR-Cas9 system. *Nature protocols* **8**, 2281-  
478 2308, doi:10.1038/nprot.2013.143 (2013).
- 479 46 Masroori, N., Merindol, N. & Berthoux, L. The interferon-induced antiviral protein PML (TRIM19)  
480 promotes the restriction and transcriptional silencing of lentiviruses in a context-specific,  
481 isoform-specific fashion. *Retrovirology* **13**, 19, doi:10.1186/s12977-016-0253-1 (2016).
- 482 47 Berthoux, L., Sebastian, S., Sokolskaja, E. & Luban, J. Cyclophilin A is required for TRIM5{alpha}-  
483 mediated resistance to HIV-1 in Old World monkey cells. *Proceedings of the National Academy*  
484 *of Sciences of the United States of America* **102**, 14849-14853 (2005).

485

486

## 487 FIGURE LEGENDS

### 488 **Fig. 1. Design of the gRNA and donor ssODN for the HDR-mediated editing of *TRIM5*.** (a)

489 *TRIM5* localization on chromosome 11 (top), and Arg332-Arg335 localization in exon 8 of the  
490 gene (bottom). (b) Top panel: position of the three gRNAs (gRNA1, 9 and 19) designed to target  
491 the Arg332-Arg335 region. The two arginine codons are underlined and in bold. Bottom panel:  
492 Surveyor assay following the transfection of HEK293T cells with CRISPR-Cas9 plasmids  
493 expressing one of the three gRNAs. WT DNA from nontransfected cells was used as a control.  
494 (c) HDR donor DNA mutagenesis strategy. 8 substitutions were present, including three

495 nonsilent substitutions to mutate Arg332 and Arg335 into Gly (green), one silent mutation to  
496 disrupt the PAM sequence (pink), and four silent mutations in the sequence targeted by gRNA1  
497 (orange). The HaeIII restriction site created as a result of one of the silent substitutions is  
498 indicated, as is the position of the primer used in specific PCR screening.

499

500 **Fig. 2. Identification of HDR-edited clones.** Following the isolation of HEK293T clones,  
501 HDR-edited clones were identified by a dual PCR screen. The figure shows the analysis of 13  
502 clones that passed a pre-screen step (see Supplementary Information). (a) PCR using a primer  
503 specific for the mutated *TRIM5*. Untransfected HEK293T cells were used as a control. M,  
504 molecular weight marker. (b) Non-specific PCR of the targeted region followed by HaeIII  
505 digestion. The expected sizes of the digested PCR products are shown on the right.

506

507 **Fig. 3. Deep sequencing analysis of *TRIM5* editing in 10 screened clones.** The ~200-nt HDR-  
508 targeted *TRIM5* region was amplified by PCR and the PCR products were then analyzed by  
509 Illumina MiSeq sequencing. The alignment shown includes the targeted locus for each allele of  
510 the 10 clones, in comparison with the WT sequence and with the expected HDR-mutated  
511 sequence (top 2 lines). Expected substitutions are shown in white. The star indicates the position  
512 of an unexpected substitution within a duplicated region in one allele of F2X. The color code for  
513 duplications/insertions and for deletions is explained at the bottom of the alignments. The Cas9  
514 cleavage site on the WT sequence is shown at the top. On the left is a table summarizing the  
515 results obtained for each clone: presence of the two therapeutic mutations R332G/R335G,  
516 proportion of *TRIM5* alleles modified by HDR and the proportion of the expected substitution

517 mutations in the HDR-edited alleles. Note that only one clone (D11) has an allele containing all  
518 the desired mutations and that most of the non-HDR-edited alleles contain indels at the cleavage  
519 site.

520

521 **Fig. 4. Retrovirus restriction ability of HDR-edited clones.** The 10 HDR-edited clones were  
522 challenged with increasing doses of GFP-expressing retroviral vectors based on HIV-1<sub>NL4-3</sub> (**a**),  
523 SIV<sub>mac239</sub> (**b**), N-MLV (**c**), B-MLV (**d**) or EIAV (**e**). Non-transfected HEK293T cells were used  
524 as a control. Infected cells were quantified by FACS for GFP expression.

525

526 **Fig. 5. Retrovirus restriction ability following IFN-I treatment.** HDR-edited clones and the  
527 non-transfected WT control cells were treated with IFN- $\alpha$ , IFN- $\beta$  or IFN- $\omega$  for 16h prior to a  
528 single-dose infection with HIV-1<sub>NL-GFP</sub> (**a**), SIV<sub>mac-GFP</sub> (**b**), N-MLV<sub>GFP</sub> (**c**) and B-MLV<sub>GFP</sub> (**d**).  
529 The percentage of infected cells was determined by FACS.

530

531

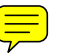

**a**

*TRIM5* genomic position

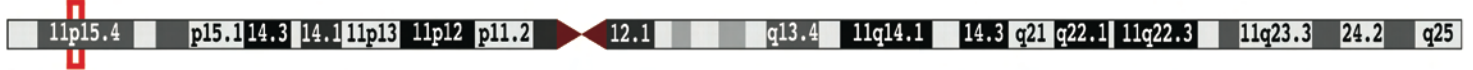

(minus strand)

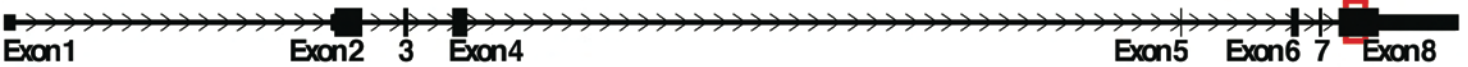

**b**

gRNA1: 5'-**AGATAATATATGGGGCACGA**-3'

gRNA9: 5'-**CCGAAACCACAGATAATATA**-3'

5' ... CTCTCCGAAACCACAGATAATATATGGGGCAC**CGA**GGGACA**AGATA**CCAGACATTTGTGAATTTCAATTAT ... 3'

3' ... GAGAGGCTTTGGTGTCTATTATATACCCCGT**GCT**CCCTGT**TCT**TATGGTCTGTAAACACTTAAAGTTAATA ... 5'

3'-**CTGTAAACACTTAAAGTTAA**-5': gRNA19

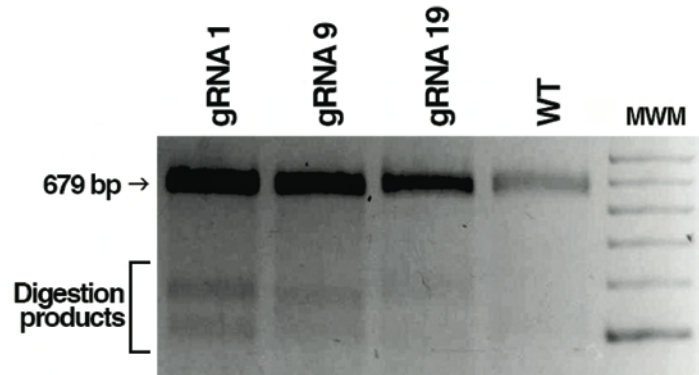

**c**

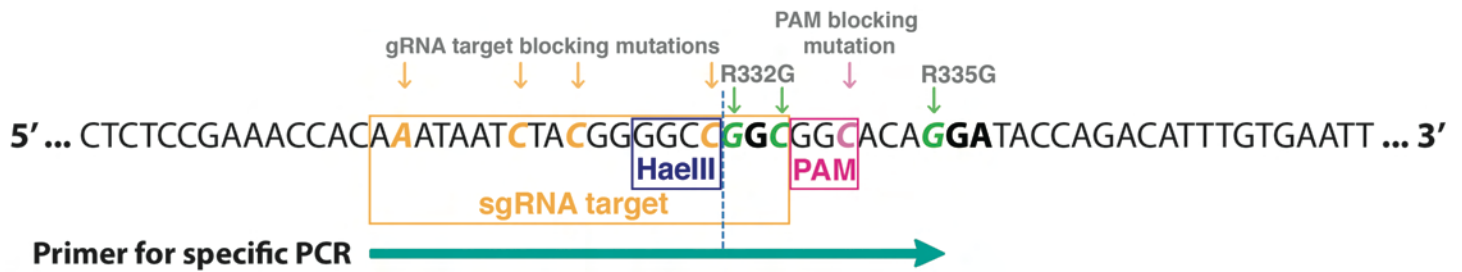

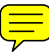

**a**

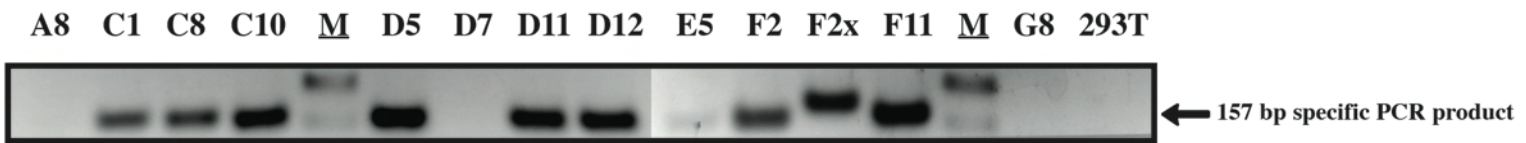

**b**

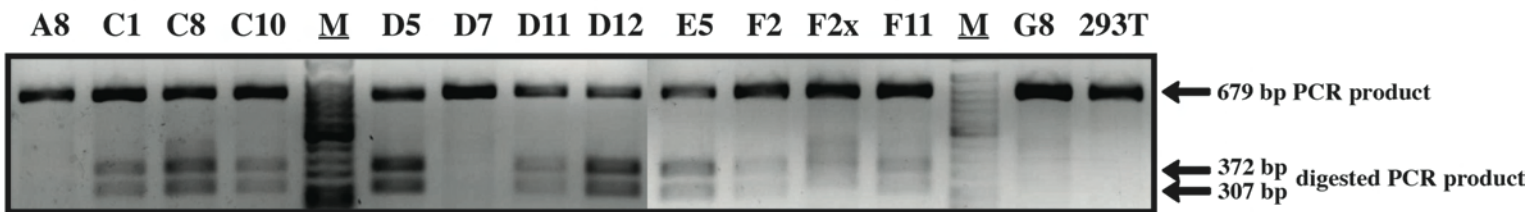



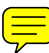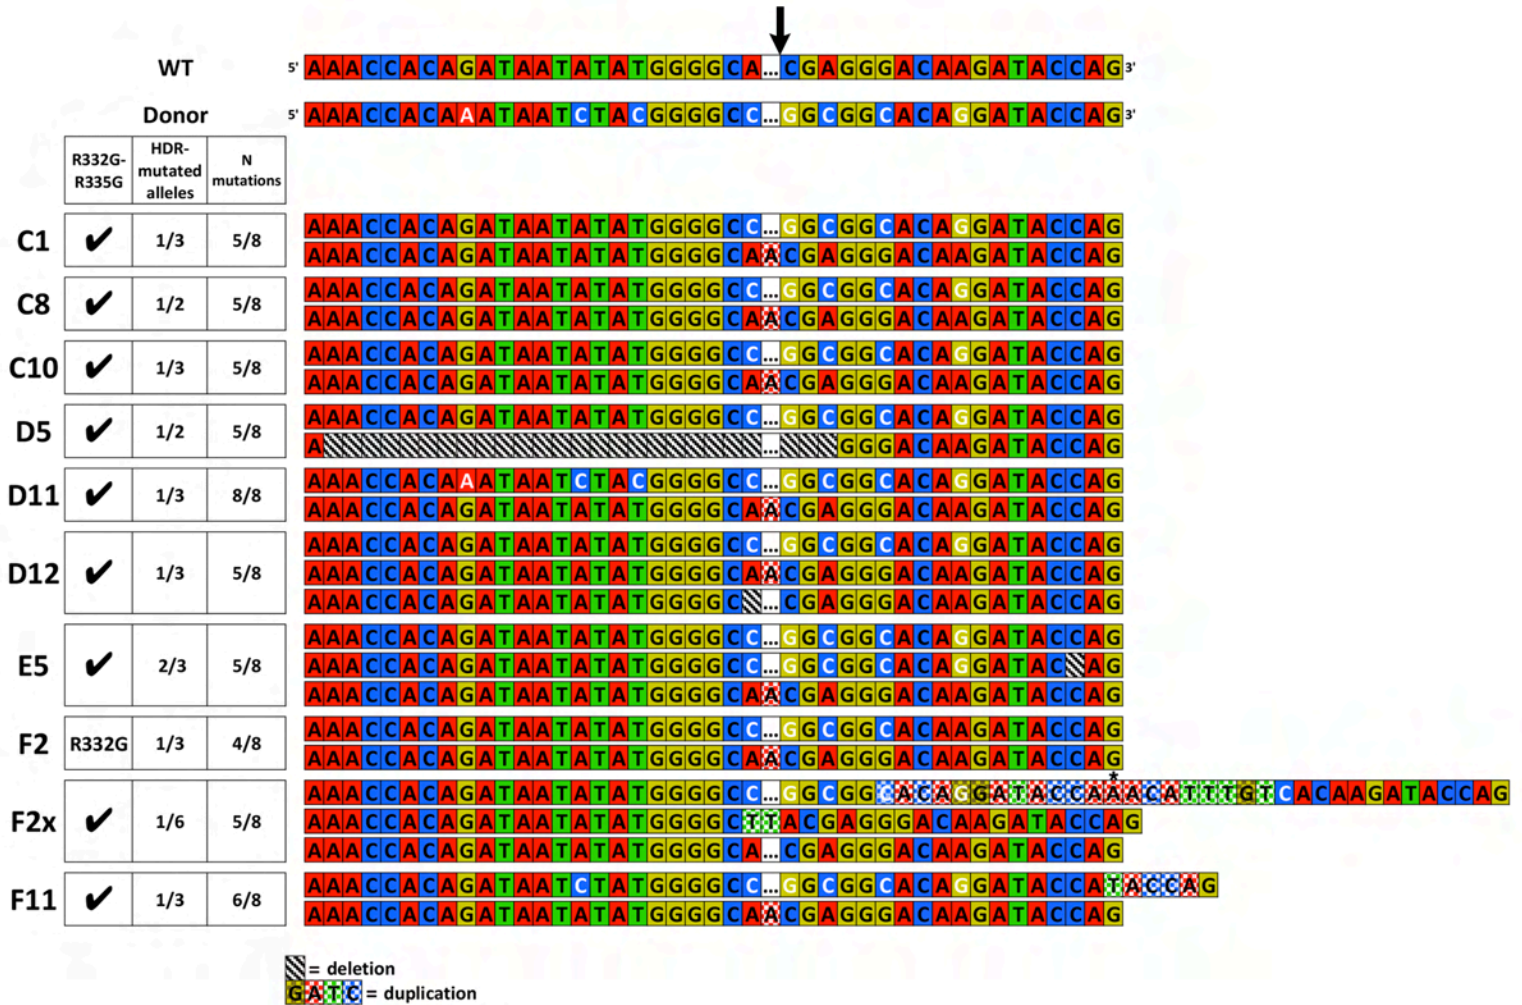

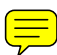

**a**

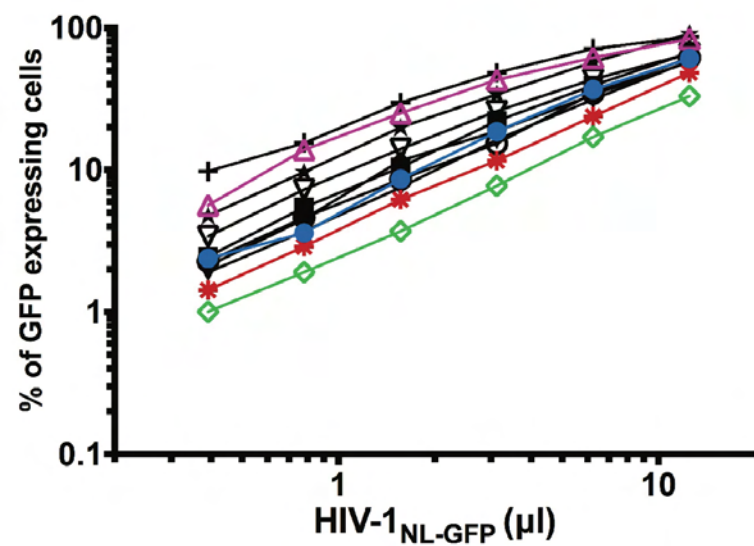

**b**

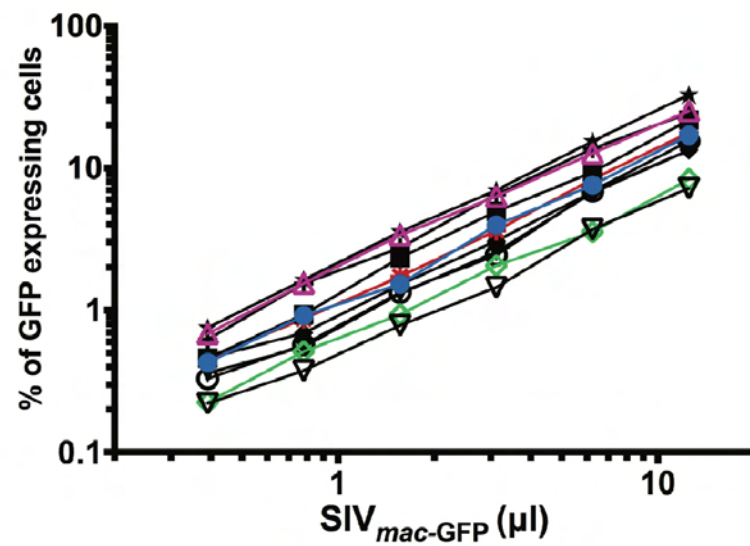

**c**

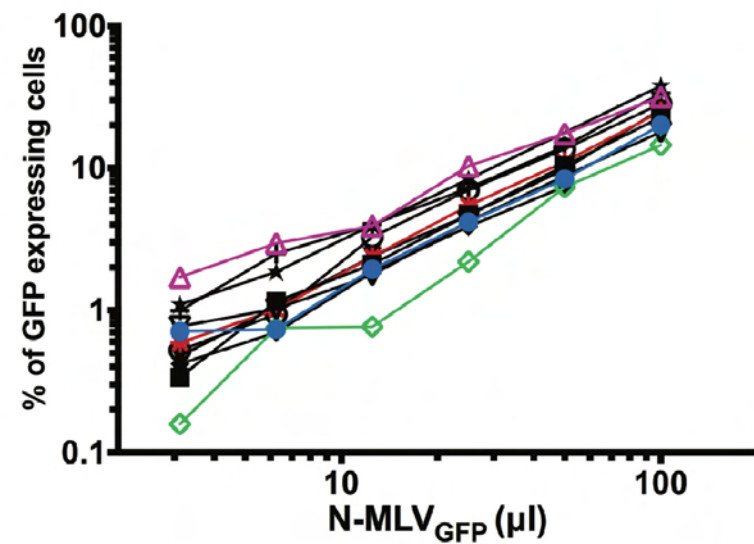

**d**

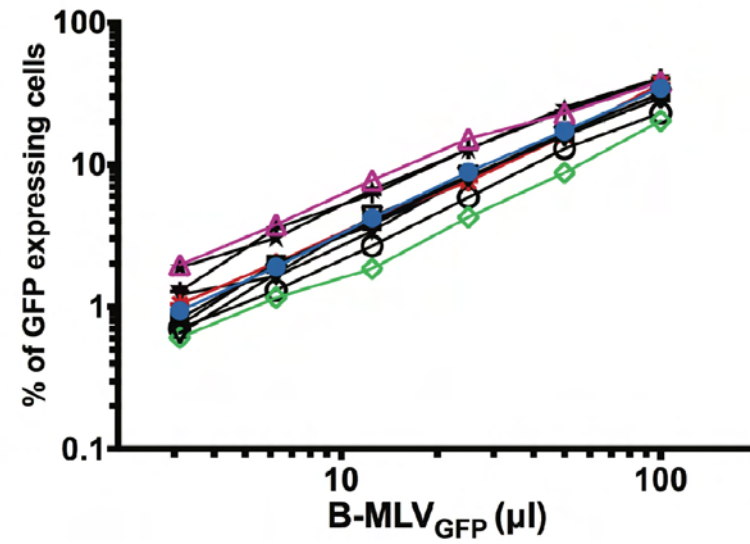

**e**

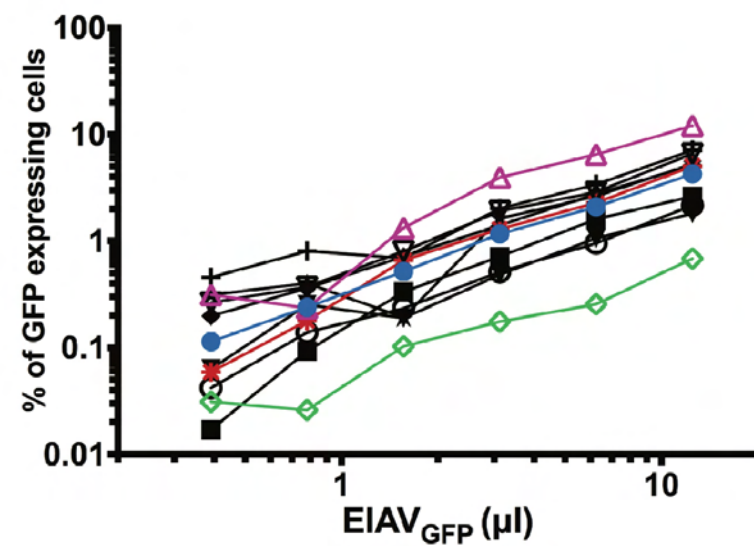

- 293T
- △ C1
- ▽ C8
- ◇ C10
- D5
- \* D11
- ★ D12
- + E5
- ▼ F2
- ◆ F2x
- F11

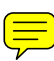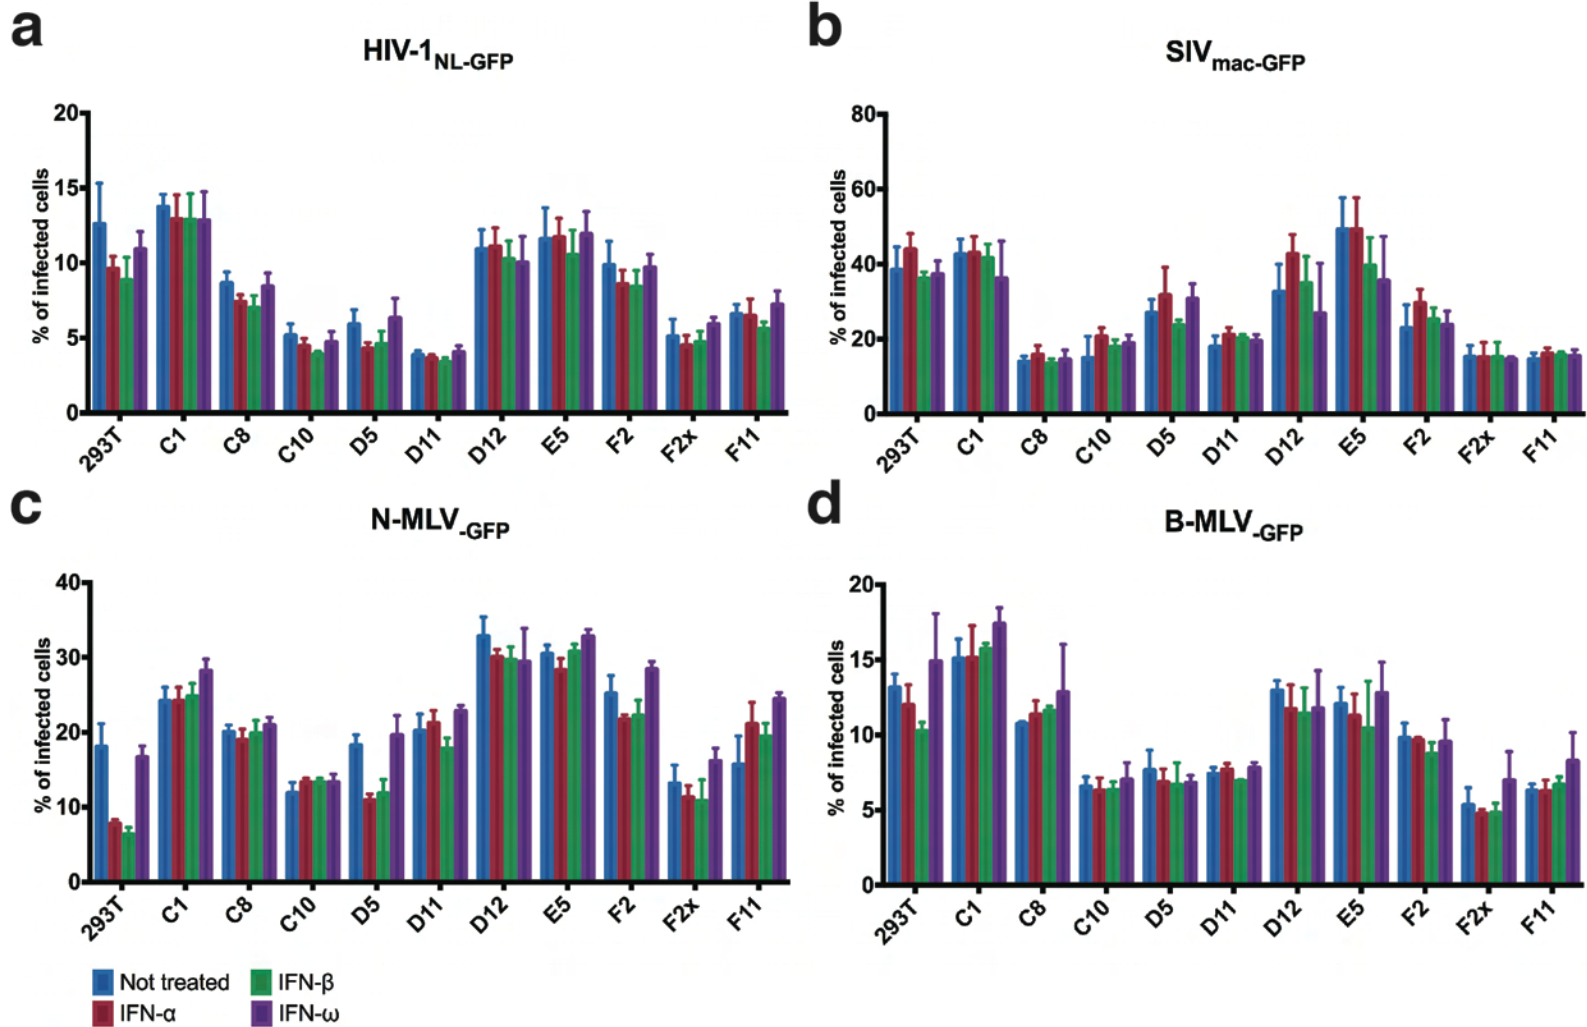

1 Caroline Dufour *et al.*

2 **Editing of the Human TRIM5 Gene to Introduce HIV-1 Restrictive**  
3 **Mutations Using CRISPR-Cas9**

4

5 **SUPPLEMENTARY INFORMATION**

6

7 **Suppl. Fig. 1. Pre-screening of 161 isolated clones by specific PCR.** Following 20 days of  
8 growth, 161 isolated HEK293T clones were screened for HDR-edited TRIM5 gene by mutation-  
9 specific PCR. 14 clones that passed this pre-screen step are indicated by their names. MWM,  
10 molecular weight marker.

11

12 **Suppl. Fig. 2.** Levels of HIV-1 restriction in HEK293T cells transduced with R332G-R335G  
13 huTRIM5 $\alpha$ . HEK293T cells were retrovirally transduced with WT huTRIM5 $\alpha$ , R332G-R335G  
14 huTRIM5 $\alpha$  or with the “empty” vector as indicated. Untransduced cells were eliminated, and the  
15 cell populations were then challenged with increasing amounts of the HIV-1<sub>NL-GFP</sub> vector. The  
16 percentage of cells expressing GFP was then determined by FACS.

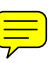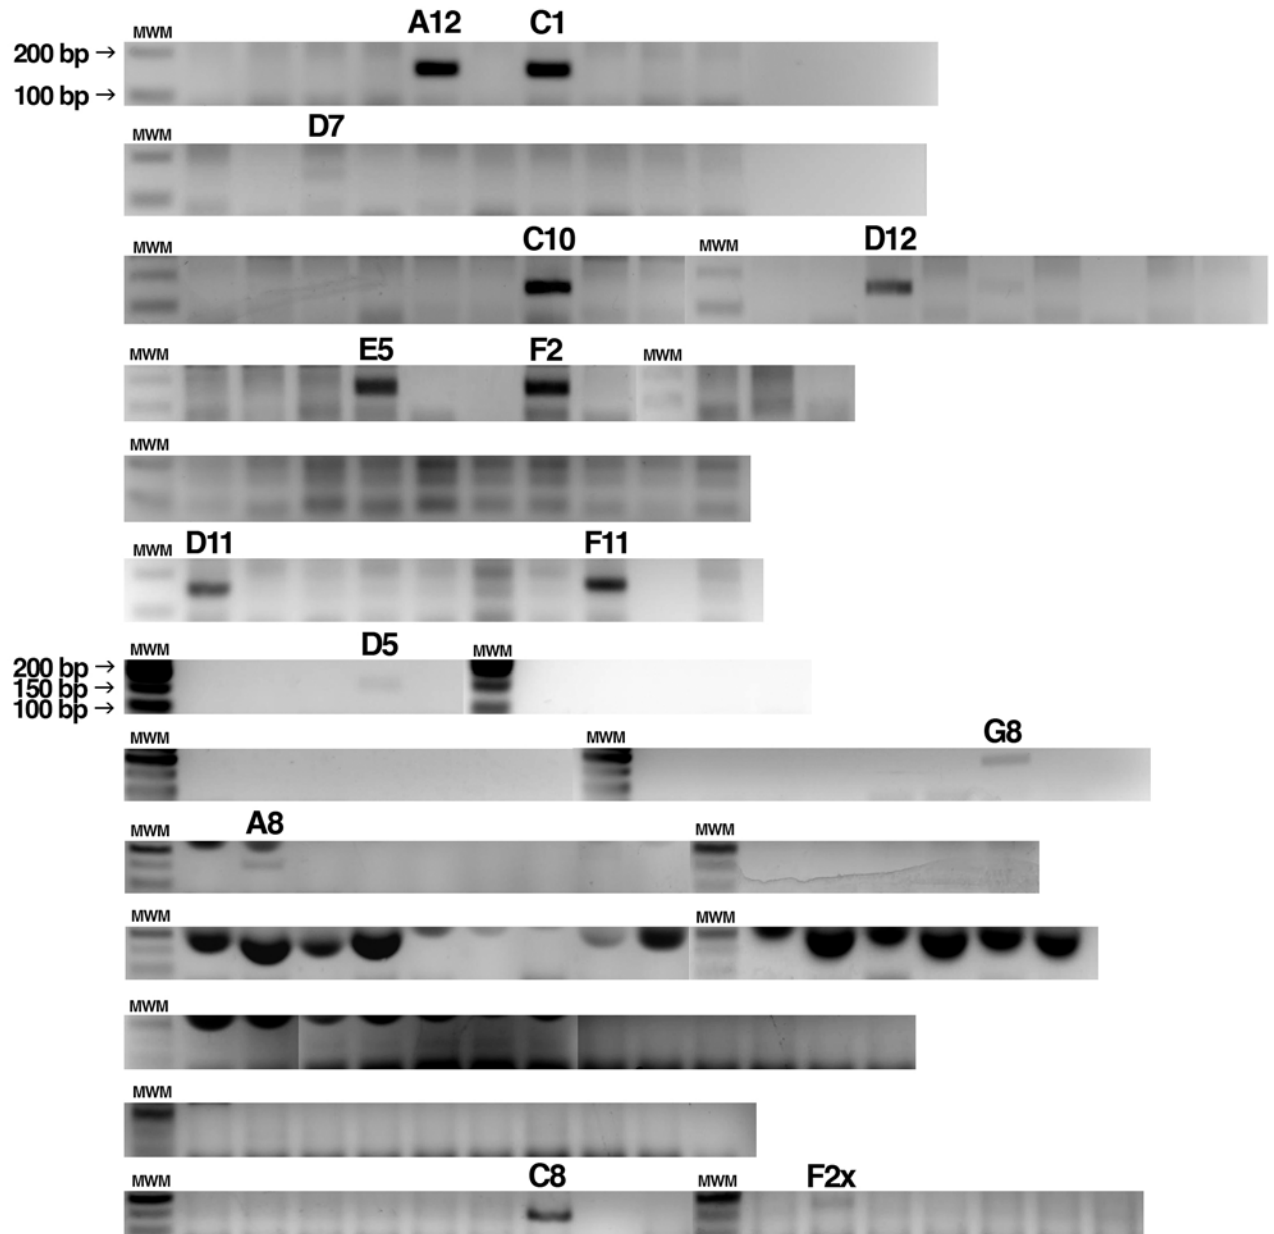

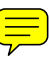

**a**

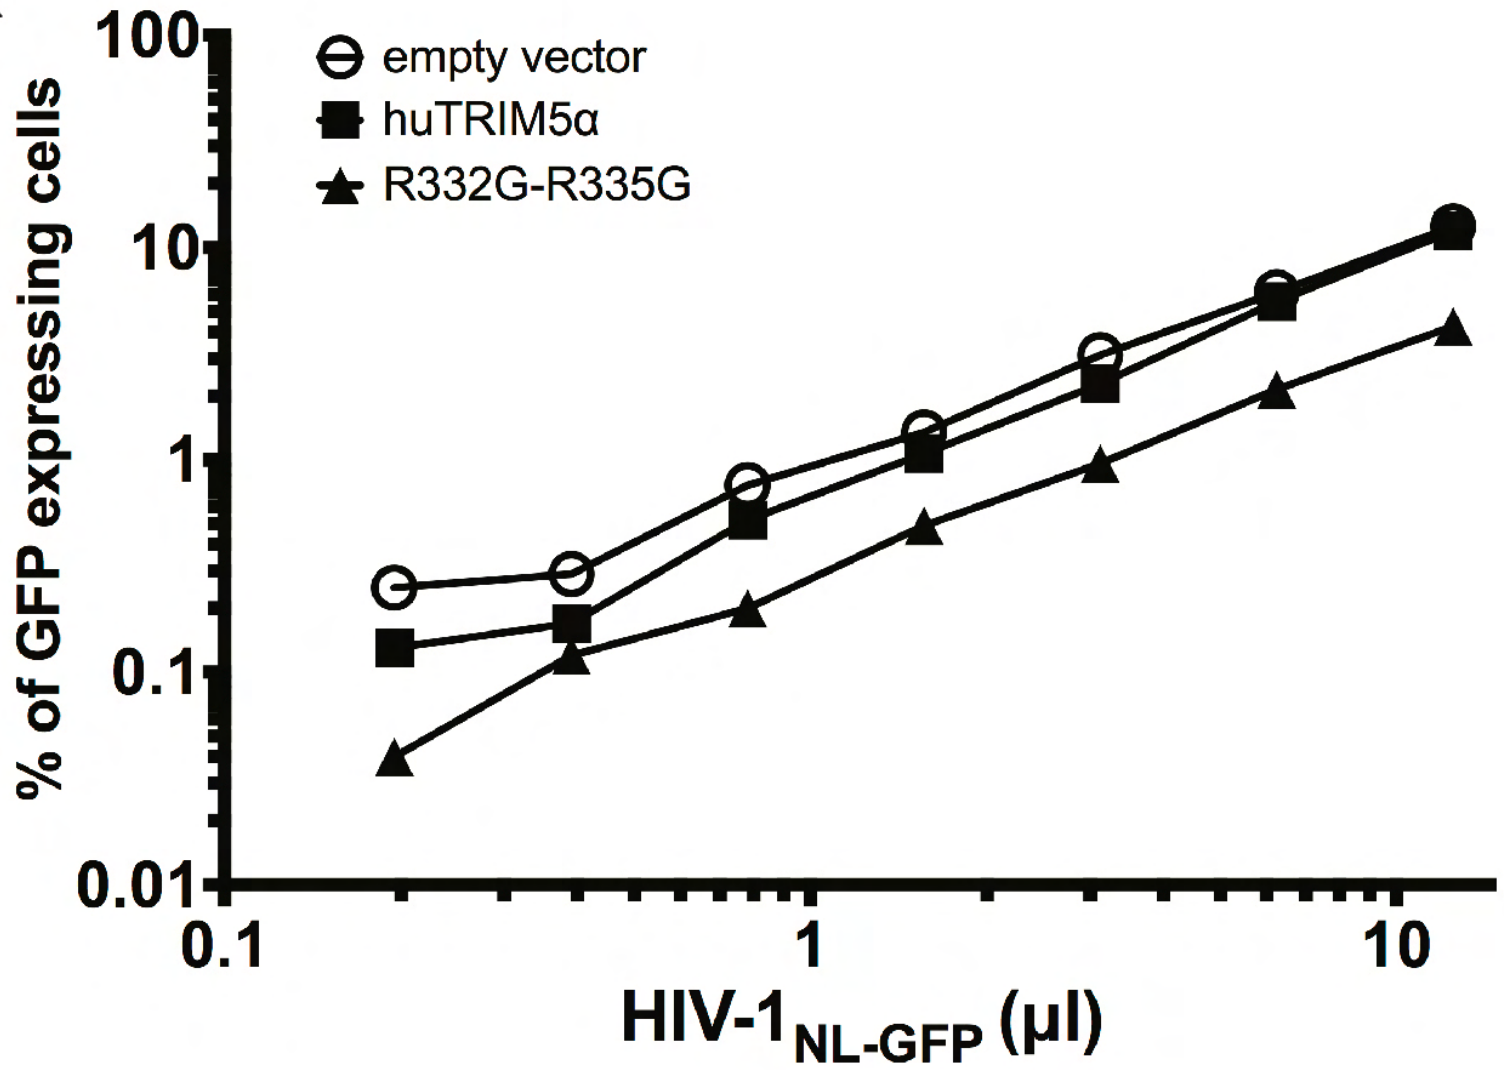

Source: http://biorxiv.org/content/10.1101/185298v1.full.pdf
